# Supplementary material for: Dativeversuselectron-sharing bonding in N-oxides and phosphane oxides R3EO and relative energies of the R2EOR isomers (E = N, P; R = H, F, Cl, Me, Ph). A theoretical study
Source: Royal Society of Chemistry journal article supplement (doi:10.1039/c8cp00951a), 2018-01-01
Supplement: c8cp00951a1.pdf [file c8cp00951a1.pdf]

## Supporting Information for:

### **Dative versus Electron-Sharing Bonding in N-Oxides and Phosphane Oxides R<sub>3</sub>EO and Relative Energies of the R<sub>2</sub>EOR Isomers (E = N, P; R = H, F, Cl, Me, Ph). A Theoretical Study**

Tao Yang<sup>a</sup>, Diego M. Andrada<sup>a,b</sup>, and Gernot Frenking<sup>\*,a,c</sup>

<sup>a</sup>*Fachbereich Chemie, Philipps-Universität Marburg, Hans-Meerwein-Strasse, Marburg  
35032, Germany*

<sup>b</sup>*Present address: Institut für Allgemeine und Anorganische Chemie, Universität des  
Saarlandes, D-66123 Saarbrücken, Germany*

<sup>c</sup>*Institute of Advanced Synthesis, Nanjing Tech University, 211816 Nanjing, China*

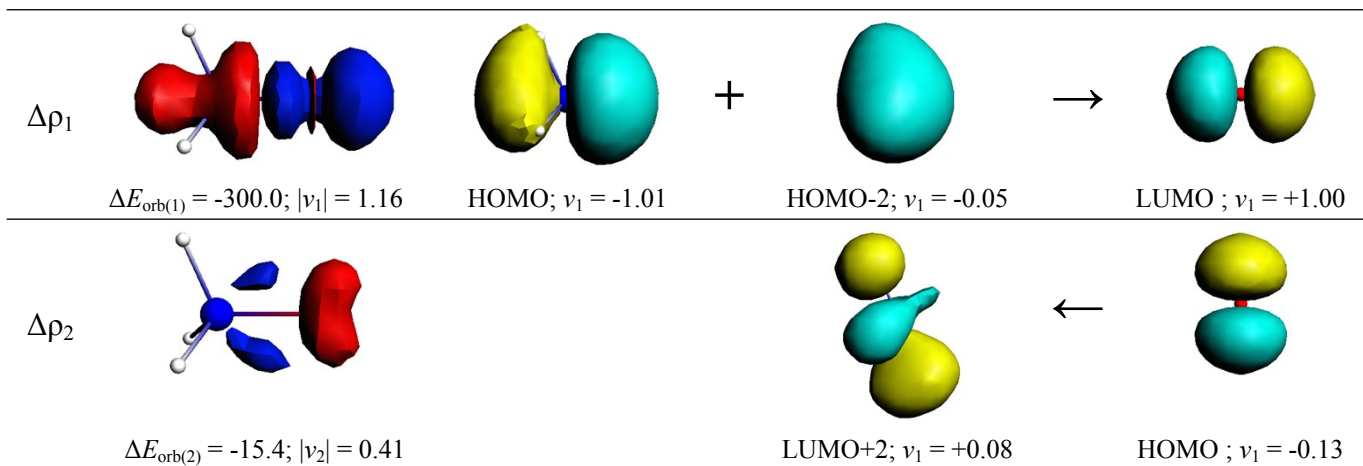(a)  $\text{H}_3\text{NO}$ 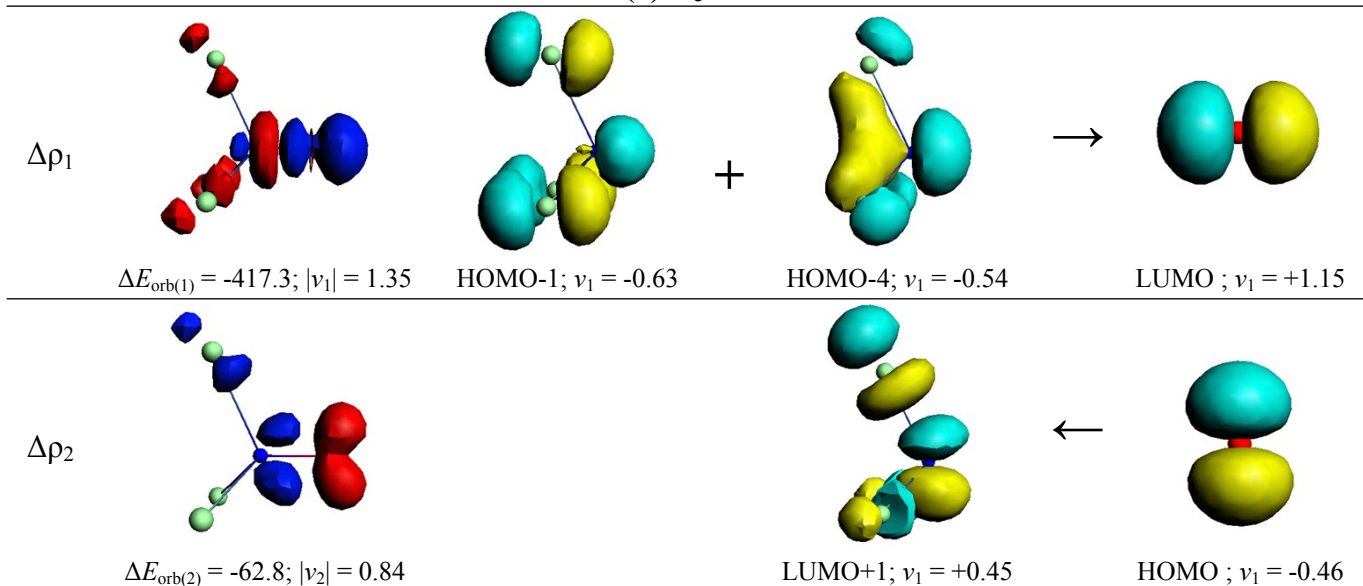(b)  $\text{Cl}_3\text{NO}$ 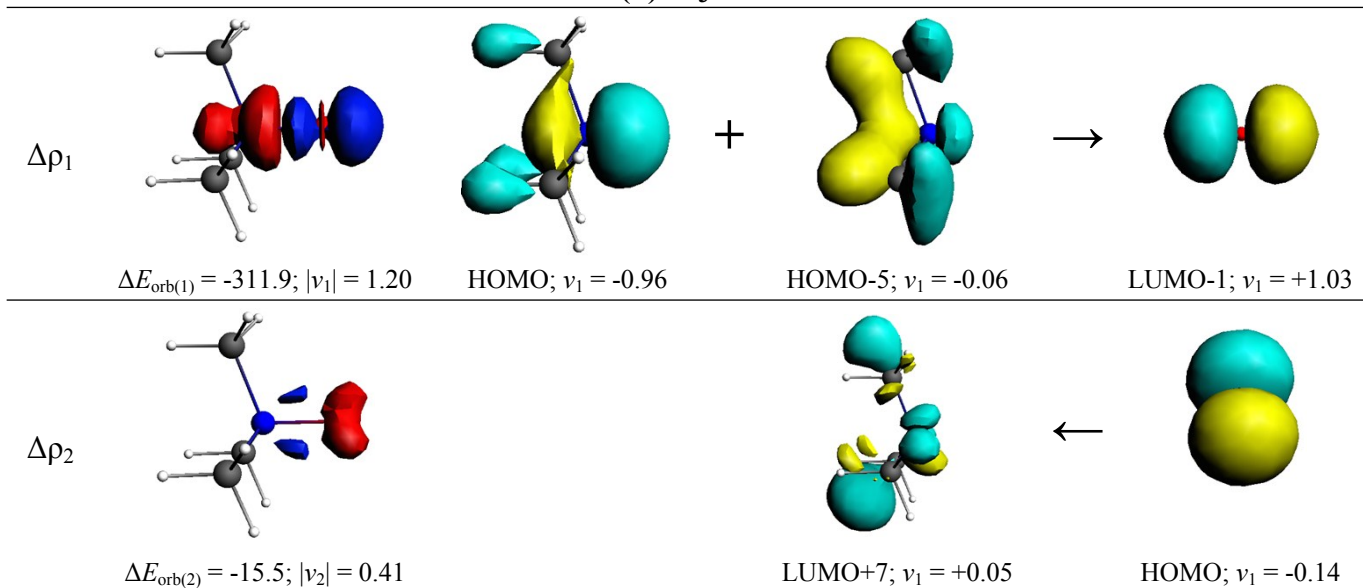(c)  $\text{Me}_3\text{NO}$

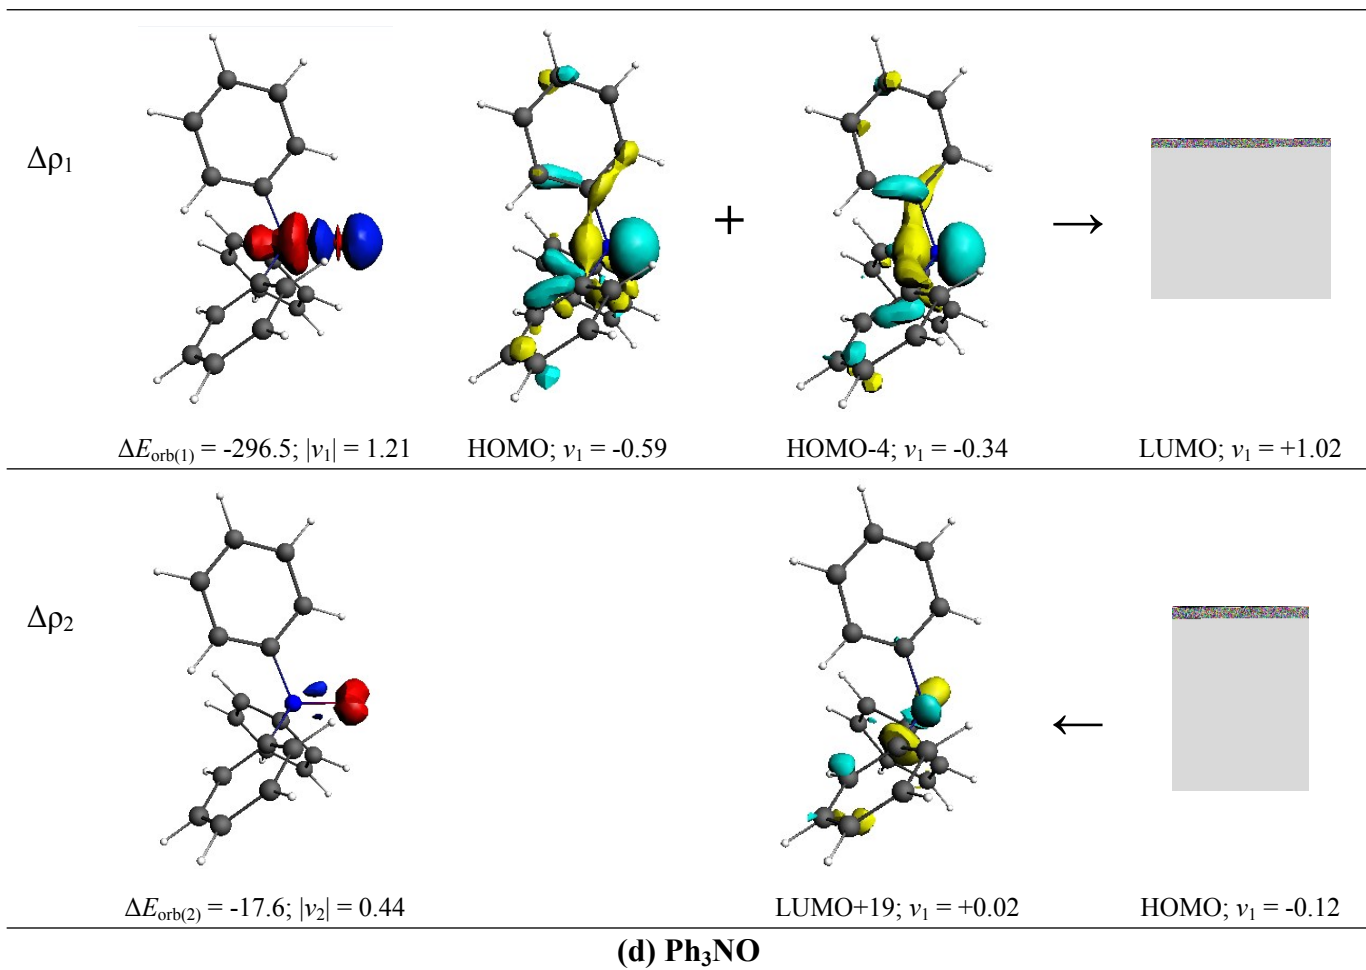

**Fig. S1** Plot of deformation densities  $\Delta\rho$  (isovalue 0.01) and shape of the most important occupied and vacant orbitals (isovalue = 0.06) of the pairwise orbital interaction for the N-oxides with dative bonds  $R_3N \rightarrow O$  in  $R_3NO$  ( $R = H, Cl, Me, Ph$ ). The color code of the deformation densities is red  $\rightarrow$  blue.

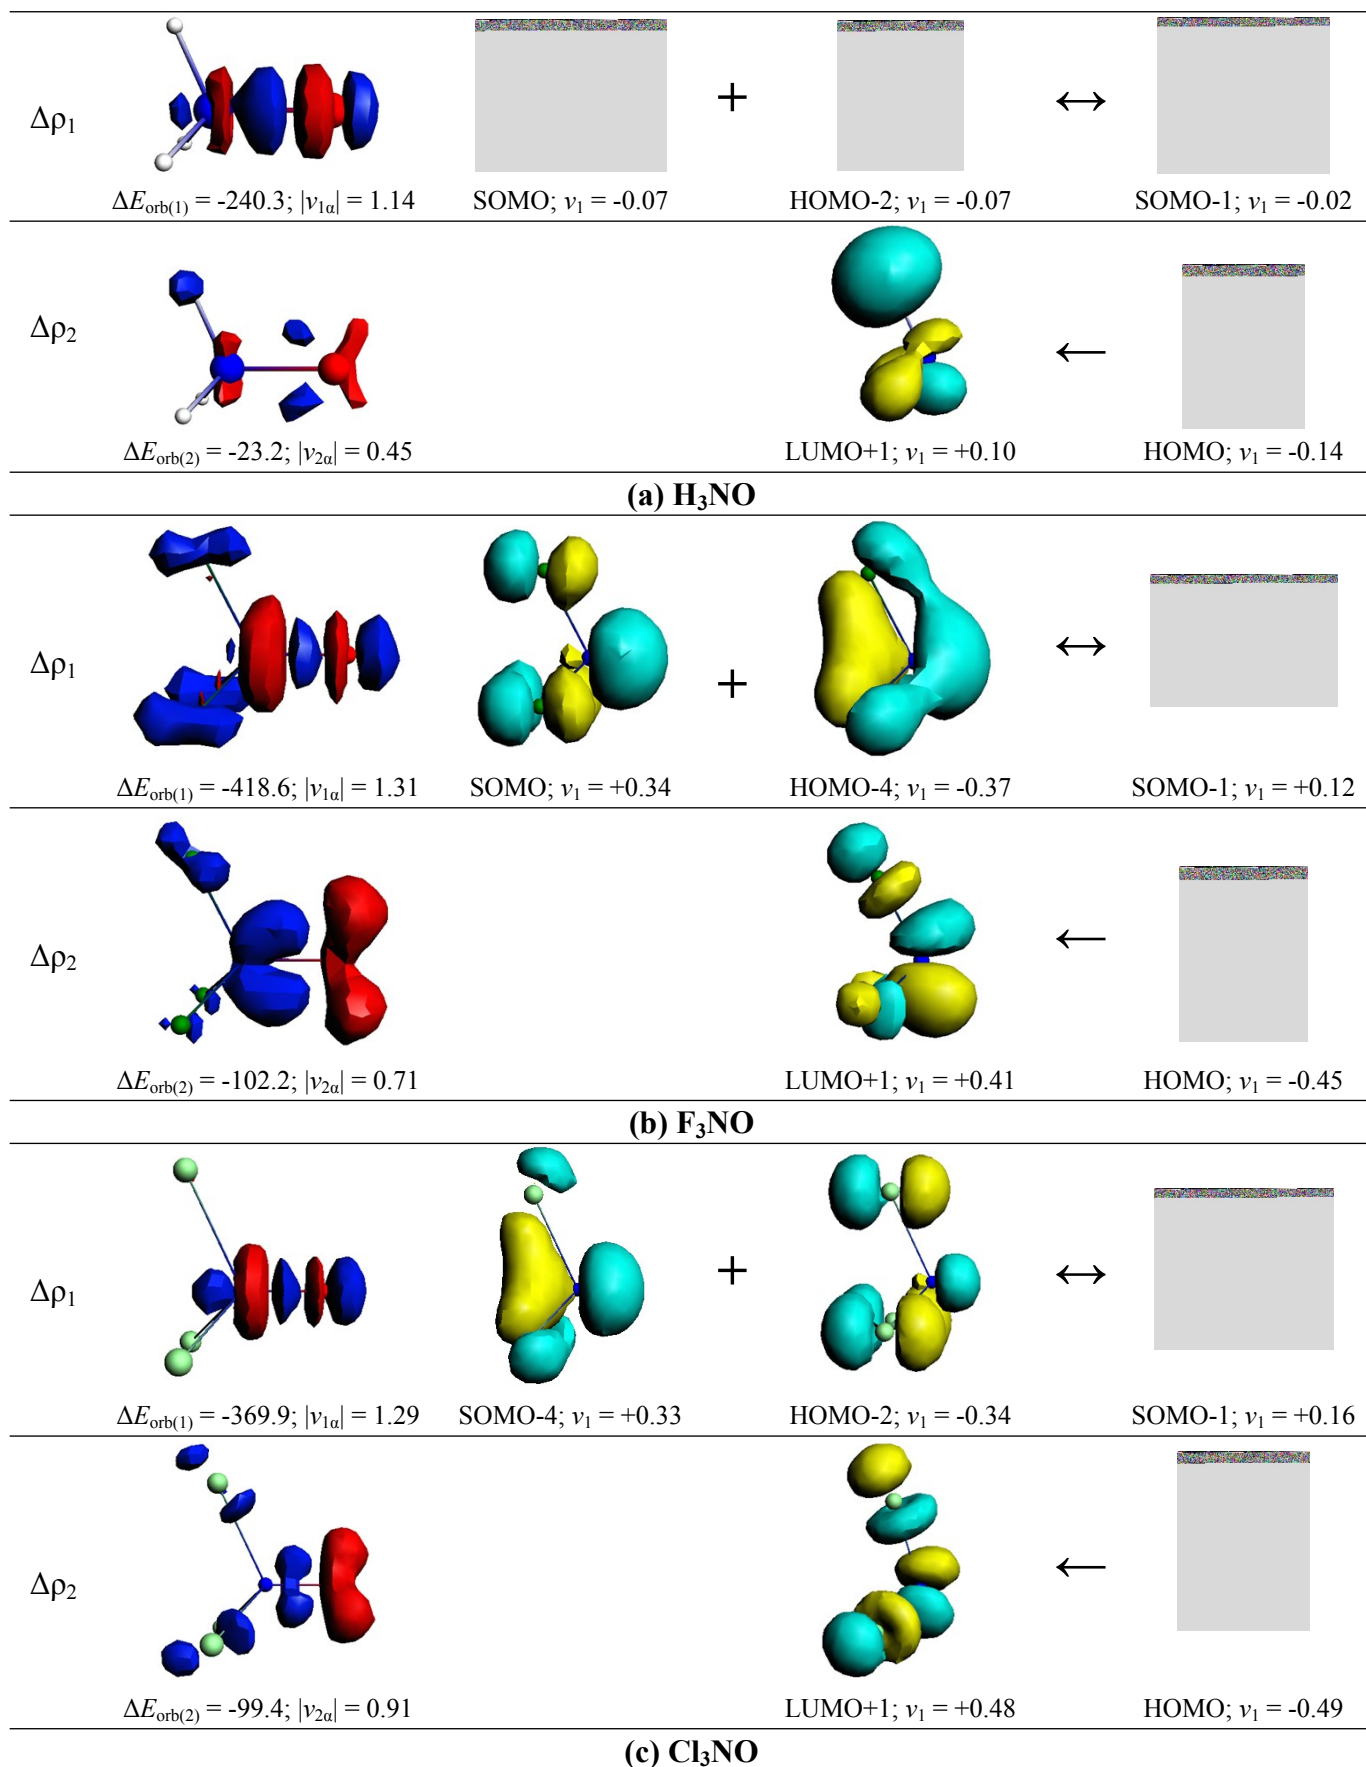

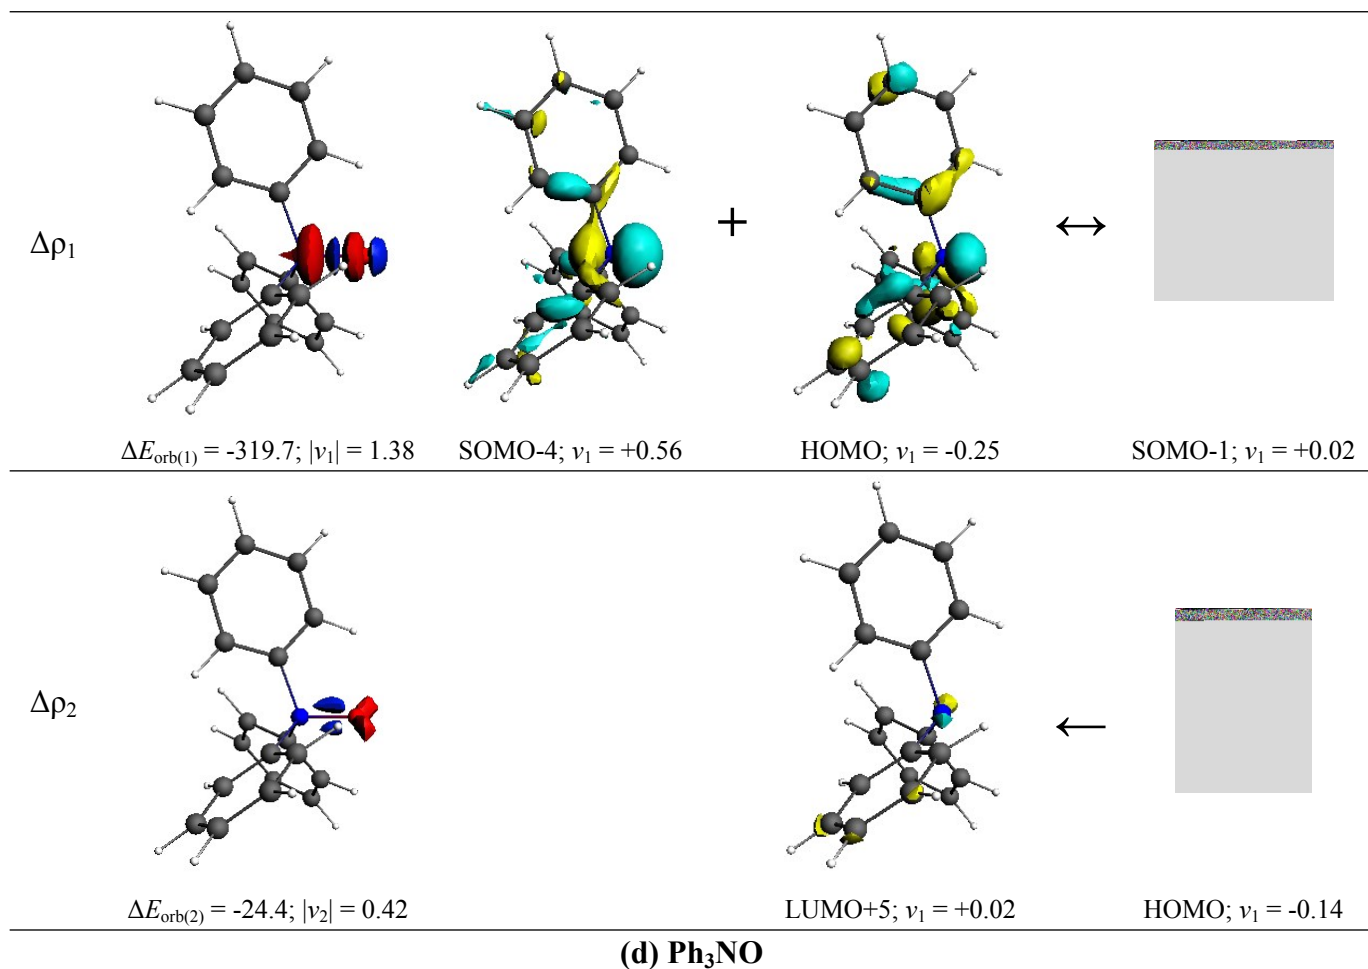

**Fig. S2** Plot of deformation densities  $\Delta\rho$  (isovalue 0.01) and shape of the most important occupied and vacant orbitals (isovalue = 0.06) of the pairwise orbital interaction for the N-oxides with electron-sharing bonds  $R_3N^+-O^-$  ( $R = H, F, Cl, Ph$ ). The color code of the deformation densities is red→blue.

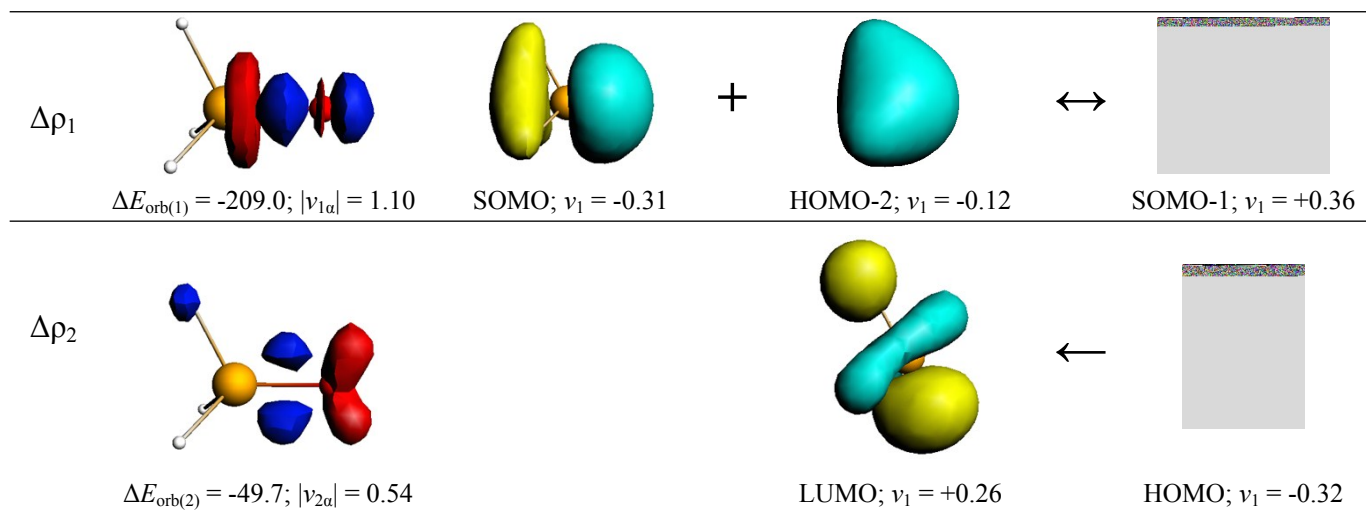(a)  $\text{H}_3\text{PO}$ 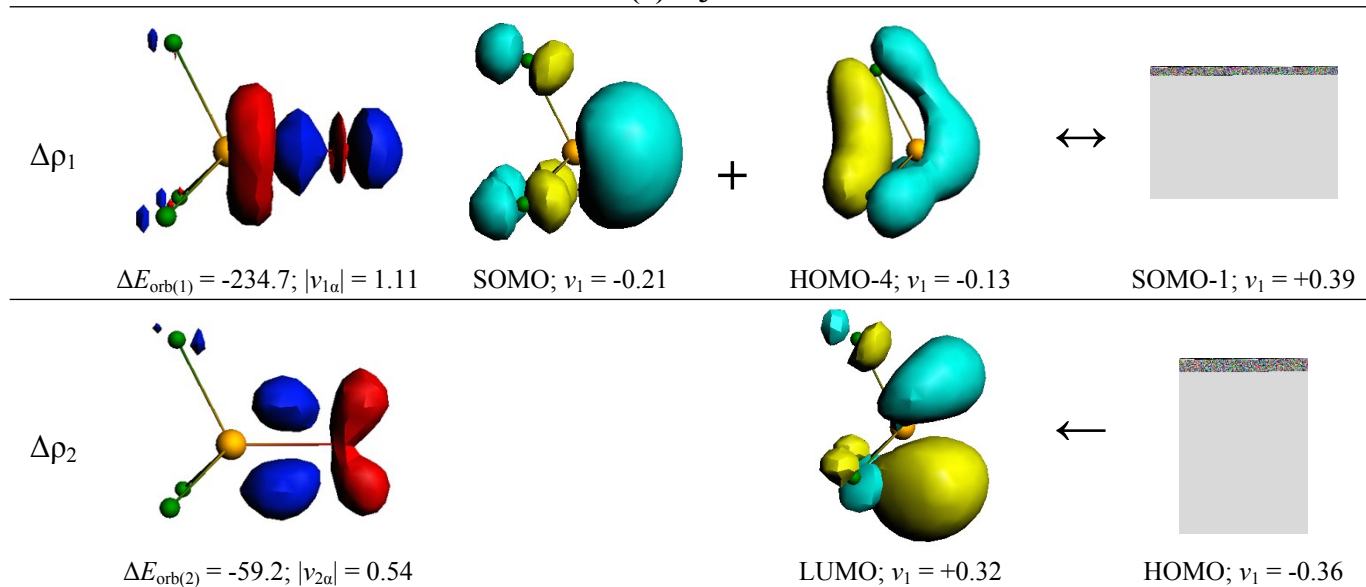(b)  $\text{F}_3\text{PO}$ 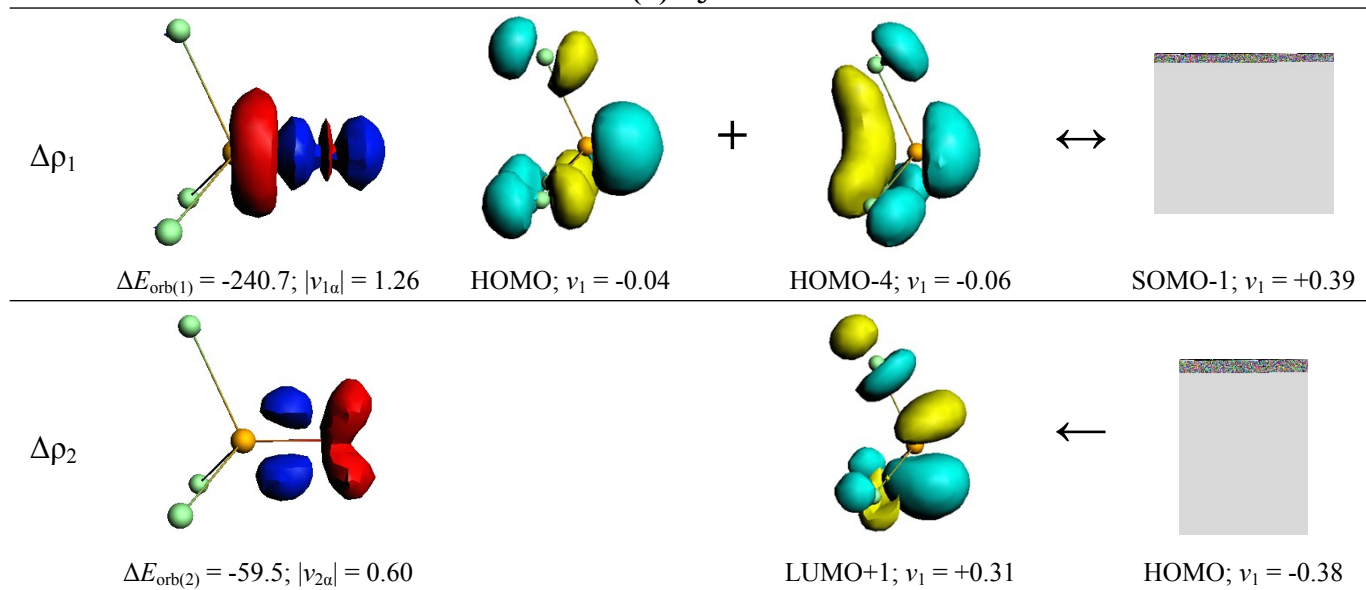(c)  $\text{Cl}_3\text{PO}$

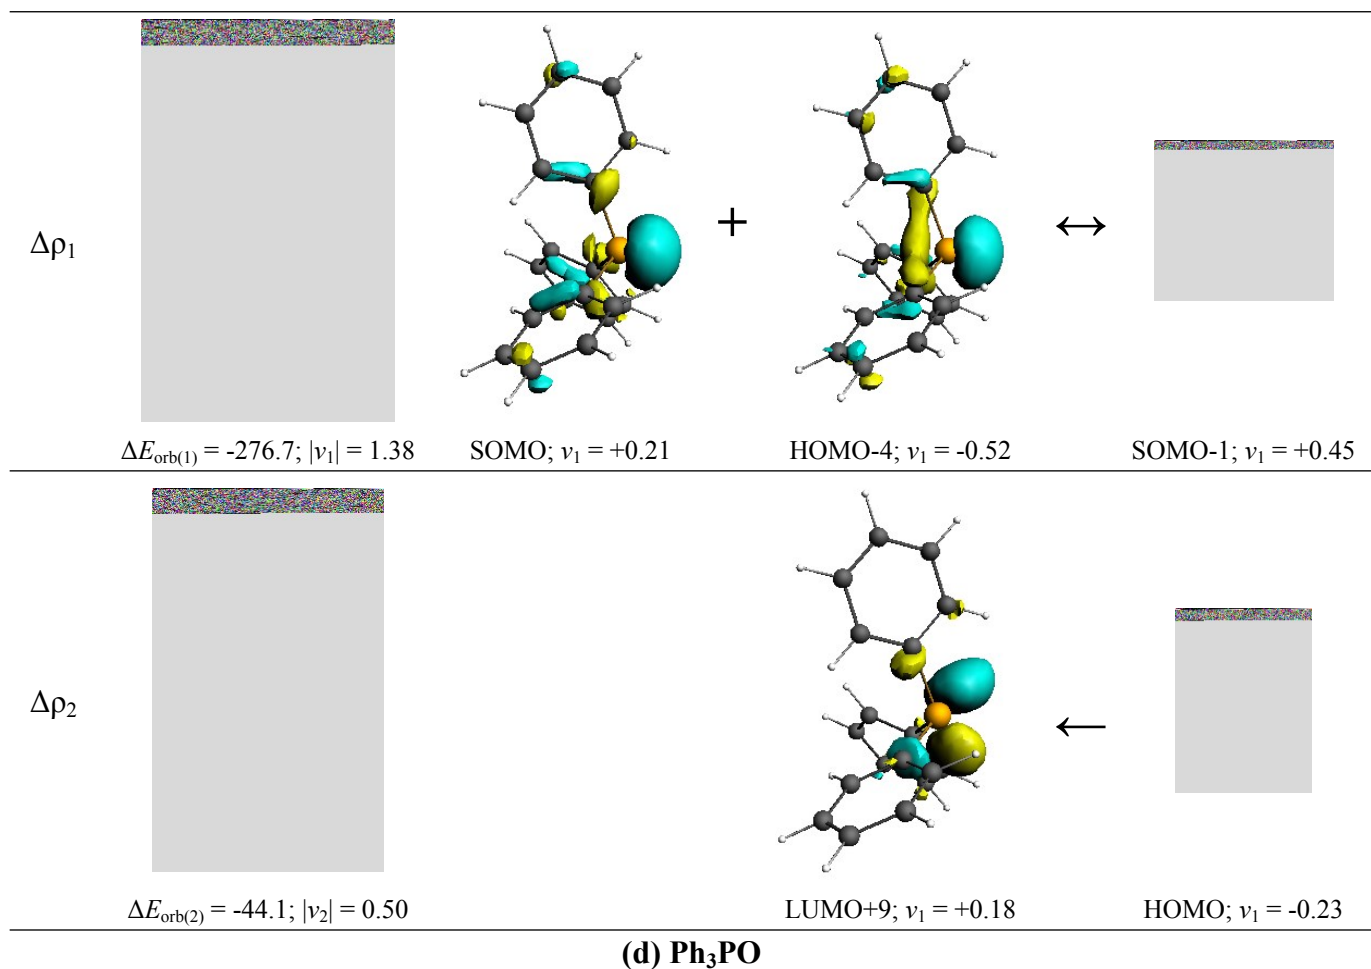

**Fig. S3** Plot of deformation densities  $\Delta\rho$  (isovalue 0.01) and shape of the most important occupied and vacant orbitals (isovalue = 0.06) of the pairwise orbital interaction for the phosphane oxides with electron-sharing bonds  $R_3P^+-O^-$  ( $R = H, F, Cl, Ph$ ). The color code of the deformation densities is red→blue.

**Energies and Cartesian coordinates of R<sub>3</sub>EO, R<sub>2</sub>EOR, and ER<sub>3</sub> (E = N, P; R = H, F, Cl, Me, Ph).**

**(I) BP86/def2-TZVPP Optimized Geometries.**

**O (<sup>3</sup>P)**

O 0.000000 0.000000 0.000000  
Energy: -75.0930319532 a.u.  
CCSD(T)/def2-TZVPP: -74.97662162 a.u.

**NH<sub>3</sub>**

N 0.000000 0.000000 0.117937  
H 0.000000 0.943357 -0.275185  
H -0.816971 -0.471679 -0.275185  
H 0.816971 -0.471679 -0.275185  
Energy: -56.5901217438 a.u.  
CCSD(T)/def2-TZVPP: -56.47580781 a.u.

**NF<sub>3</sub>**

N 0.000000 0.000000 0.493688  
F 0.000000 1.256833 -0.127993  
F -1.088449 -0.628417 -0.127993  
F 1.088449 -0.628417 -0.127993  
Energy: -354.282920572 a.u.  
CCSD(T)/def2-TZVPP: -353.69440128 a.u.

**NCl<sub>3</sub>**

N 0.000000 0.000000 0.575528  
Cl 0.000000 1.673462 -0.078994  
Cl -1.449260 -0.836731 -0.078994  
Cl 1.449260 -0.836731 -0.078994  
Energy: -1435.465860141 a.u.  
CCSD(T)/def2-TZVPP: -1433.72183965 a.u.

**NMe<sub>3</sub>**

N 0.000005 -0.000016 0.376426  
C -0.072235 1.387056 -0.060912  
H -0.987733 1.853178 0.328542  
H 0.789798 1.945859 0.328662  
H -0.077684 1.493466 -1.169987  
C -1.165140 -0.756073 -0.060921  
H -2.080083 -0.288922 0.328672  
H -1.254515 -0.813910 -1.169972  
H -1.111193 -1.782058 0.328434  
C 1.237374 -0.630973 -0.060921  
H 1.332145 -0.679505 -1.169950  
H 2.098867 -0.071156 0.328392  
H 1.290363 -1.656900 0.328742  
Energy: -174.5457198733 a.u.  
CCSD(T)/def2-TZVPP: -174.16461111 a.u.

**NPh<sub>3</sub>**

N 0.000126 0.000121 -0.001287  
C -1.110520 0.885883 -0.000598  
C -1.094181 2.054150 -0.783514  
C -2.245309 0.609616 0.782959  
C -2.183852 2.924330 -0.773616  
C -3.335958 1.478619 0.774638  
C -3.313267 2.642902 0.000958  
H -0.222310 2.273498 -1.398894  
H -2.264970 -0.289695 1.397656  
H -2.153622 3.823972 -1.389251  
H -4.205799 1.248696 1.390895  
H -4.165071 3.322477 0.001653  
C 1.322536 0.518861 -0.000638  
C 2.326332 -0.080520 -0.782466  
C 1.650724 1.640529 0.781823



|   |           |           |           |
|---|-----------|-----------|-----------|
| C | 3.624868  | 0.427815  | -0.772689 |
| C | 2.948735  | 2.150294  | 0.773342  |
| C | 3.945859  | 1.547452  | 0.000682  |
| H | 2.080494  | -0.945956 | -1.396885 |
| H | 0.881647  | 2.108081  | 1.395762  |
| H | 4.388944  | -0.049100 | -1.387520 |
| H | 3.184456  | 3.019234  | 1.388678  |
| H | 4.960347  | 1.945192  | 0.001185  |
| C | -0.211896 | -1.404548 | -0.000640 |
| C | 0.593975  | -2.249315 | 0.783518  |
| C | -1.231405 | -1.974282 | -0.784212 |
| C | 0.386467  | -3.628294 | 0.775053  |
| C | -1.440467 | -3.353004 | -0.774451 |
| C | -0.632730 | -4.190563 | 0.000632  |
| H | 1.382252  | -1.816812 | 1.398806  |
| H | -1.856748 | -1.328761 | -1.400016 |
| H | 1.019923  | -4.266755 | 1.391789  |
| H | -2.234359 | -3.776460 | -1.390656 |
| H | -0.795526 | -5.268010 | 0.001117  |

Energy: -749.9974928101 a.u.

### H<sub>3</sub>NO

|   |           |           |           |
|---|-----------|-----------|-----------|
| N | 0.000000  | 0.000000  | -0.526097 |
| H | 0.000000  | 0.958096  | -0.954118 |
| H | -0.829735 | -0.479048 | -0.954118 |
| H | 0.829735  | -0.479048 | -0.954118 |
| O | 0.000000  | 0.000000  | 0.818129  |

Energy: -131.7557198331 a.u.  
CCSD(T)/def2-TZVPP: -131.49909986 a.u.

### H<sub>2</sub>NOH

|   |           |           |           |
|---|-----------|-----------|-----------|
| N | -0.696809 | 0.000242  | 0.157147  |
| H | -1.046000 | -0.814653 | -0.359472 |
| H | -1.046133 | 0.813549  | -0.361999 |
| O | 0.731627  | -0.000257 | -0.141039 |
| H | 1.116779  | 0.001470  | 0.749753  |

Energy: -131.7928993157 a.u.  
CCSD(T)/def2-TZVPP: -131.54360957 a.u.

### F<sub>3</sub>NO

|   |           |           |           |
|---|-----------|-----------|-----------|
| N | 0.000000  | 0.000000  | 0.213725  |
| F | 0.000000  | 1.301036  | -0.462038 |
| F | -1.126731 | -0.650518 | -0.462038 |
| F | 1.126731  | -0.650518 | -0.462038 |
| O | 0.000000  | 0.000000  | 1.372369  |

Energy: -429.5147727009 a.u.  
CCSD(T)/def2-TZVPP: -428.77412735 a.u.

### F<sub>2</sub>NOF

|   |           |           |           |
|---|-----------|-----------|-----------|
| N | -0.505649 | 0.000131  | 0.468711  |
| F | -0.948443 | -1.100779 | -0.292328 |
| F | -0.948621 | 1.100505  | -0.292709 |
| O | 0.656588  | 0.000327  | 0.800149  |
| F | 1.706712  | -0.000119 | -0.490759 |

Energy: -429.4609955352 a.u.  
CCSD(T)/def2-TZVPP: -428.71631769 a.u.

### Cl<sub>3</sub>NO

|    |           |           |           |
|----|-----------|-----------|-----------|
| N  | 0.000000  | 0.000000  | 0.506122  |
| Cl | 0.000000  | 1.763709  | -0.332641 |
| Cl | -1.527416 | -0.881854 | -0.332641 |
| Cl | 1.527416  | -0.881854 | -0.332641 |
| O  | 0.000000  | 0.000000  | 1.677728  |

Energy: -1510.694019772 a.u.  
CCSD(T)/def2-TZVPP: -1508.79337179 a.u.

### Cl<sub>2</sub>NOCl

|    |           |           |           |
|----|-----------|-----------|-----------|
| N  | -0.532364 | -0.000045 | -0.651618 |
| Cl | -1.110548 | 1.470399  | 0.226969  |

Cl -1.108450 -1.471406 0.226892  
O 0.622986 0.000338 -1.059290  
Cl 2.145037 0.000867 0.312941  
Energy: -1510.683223353 a.u.  
CCSD(T)/def2-TZVPP: -1508.78207401 a.u.

**Me<sub>3</sub>NO**

N -0.000024 -0.000025 0.095946  
O -0.000133 -0.000090 1.449029  
C 1.360527 -0.404204 -0.423066  
H 1.566822 -1.396858 -0.013616  
H 1.392091 -0.413242 -1.522028  
H 2.075309 0.314547 -0.013089  
C -1.030300 -0.975985 -0.423255  
H -0.765428 -1.954484 -0.013408  
H -1.993124 -0.658282 -0.013893  
H -1.053720 -0.998783 -1.522256  
C -0.330103 1.380285 -0.423112  
H -0.336619 1.412387 -1.522071  
H -1.310547 1.639675 -0.014415  
H 0.425711 2.055351 -0.012483  
Energy: -249.7383941797 a.u.  
CCSD(T)/def2-TZVPP: -249.22431391 a.u.

**Me<sub>2</sub>NOMe**

N 0.391410 -0.000061 -0.334382  
O -0.758626 -0.006958 0.573569  
C 1.141199 1.211097 -0.011299  
H 0.518121 2.089098 -0.218208  
H 1.468415 1.240849 1.045866  
H 2.026236 1.250934 -0.661249  
C 1.152721 -1.204515 -0.013623  
H 2.038857 -1.233761 -0.662626  
H 1.479190 -1.233671 1.043810  
H 0.538524 -2.088061 -0.223300  
C -1.948539 -0.001432 -0.207996  
H -2.018826 0.900300 -0.837949  
H -2.018145 -0.893622 -0.851363  
H -2.775524 -0.006873 0.514653  
Energy: -249.7563724566 a.u.  
CCSD(T)/def2-TZVPP: -249.24069385 a.u.

**Ph<sub>3</sub>NO**

N 0.000942 -0.000398 0.728785  
C 1.442076 0.065989 0.219846  
C 2.389312 -0.590044 1.001279  
C 1.803205 0.756995 -0.933927  
C 3.727132 -0.565440 0.607760  
C 3.152157 0.786735 -1.311243  
C 4.113069 0.124654 -0.547091  
H 2.053272 -1.073004 1.916811  
H 1.058413 1.279807 -1.530665  
H 4.474292 -1.077652 1.214322  
H 3.444531 1.337745 -2.205327  
H 5.161807 0.154019 -0.843056  
C -0.663296 -1.280573 0.219881  
C -0.235287 -1.949065 -0.924039  
C -1.717652 -1.761451 0.991671  
C -0.886239 -3.131130 -1.301133  
C -2.367400 -2.930877 0.598147  
C -1.952430 -3.620589 -0.546910  
H 0.599228 -1.574184 -1.513248  
H -1.976412 -1.221937 1.900691  
H -0.547302 -3.667995 -2.187354  
H -3.194582 -3.312626 1.196956  
H -2.453356 -4.542461 -0.842777  
C -0.776497 1.214392 0.218577  
C -0.685195 2.362479 1.000556  
C -1.552212 1.180992 -0.937420

|   |           |           |           |
|---|-----------|-----------|-----------|
| C | -1.375576 | 3.508137  | 0.605414  |
| C | -2.252559 | 2.333686  | -1.316420 |
| C | -2.162975 | 3.496749  | -0.551587 |
| H | -0.101425 | 2.313230  | 1.917725  |
| H | -1.629933 | 0.274430  | -1.534409 |
| H | -1.308268 | 4.411217  | 1.212414  |
| H | -2.873466 | 2.311047  | -2.212215 |
| H | -2.713036 | 4.389750  | -0.848720 |
| O | 0.000231  | -0.001054 | 2.087149  |

Energy: -825.1560164583 a.u.

**Ph<sub>2</sub>NOPh**

|   |           |           |           |
|---|-----------|-----------|-----------|
| N | 0.382653  | 0.042867  | 0.027532  |
| C | 1.416901  | 1.015611  | 0.037940  |
| C | 1.069906  | 2.374302  | -0.075865 |
| C | 2.771758  | 0.658977  | 0.134977  |
| C | 2.063772  | 3.349316  | -0.101414 |
| C | 3.758036  | 1.646211  | 0.089721  |
| C | 3.414994  | 2.994326  | -0.027908 |
| H | 0.020532  | 2.657464  | -0.136724 |
| H | 3.052784  | -0.386130 | 0.249368  |
| H | 1.777969  | 4.398050  | -0.187290 |
| H | 4.805486  | 1.352644  | 0.165856  |
| H | 4.189152  | 3.760557  | -0.056205 |
| C | 0.636388  | -1.355408 | 0.049278  |
| C | 1.334662  | -1.922745 | -1.032210 |
| C | 0.156487  | -2.185646 | 1.072355  |
| C | 1.572753  | -3.294945 | -1.066762 |
| C | 0.386125  | -3.562274 | 1.015060  |
| C | 1.098979  | -4.124972 | -0.044960 |
| H | 1.681346  | -1.281696 | -1.842278 |
| H | -0.398381 | -1.751612 | 1.900678  |
| H | 2.117460  | -3.720508 | -1.909987 |
| H | 0.005081  | -4.197653 | 1.815106  |
| H | 1.275722  | -5.199510 | -0.082285 |
| O | -0.668768 | 0.426191  | 0.926366  |
| C | -1.918082 | 0.520785  | 0.321164  |
| C | -2.964552 | 0.830846  | 1.198846  |
| C | -2.154351 | 0.342056  | -1.042862 |
| C | -4.258112 | 0.966392  | 0.697668  |
| C | -3.459604 | 0.480355  | -1.526079 |
| C | -4.514442 | 0.791295  | -0.666540 |
| H | -2.749717 | 0.965021  | 2.258695  |
| H | -1.329991 | 0.100535  | -1.709561 |
| H | -5.071730 | 1.209947  | 1.381376  |
| H | -3.646333 | 0.340729  | -2.591262 |
| H | -5.527513 | 0.895673  | -1.053584 |

Energy: -825.2036170434 a.u.

**PH<sub>3</sub>**

|   |           |           |           |
|---|-----------|-----------|-----------|
| P | 0.000000  | 0.000000  | 0.131339  |
| H | 0.000000  | 1.192080  | -0.656695 |
| H | -1.032372 | -0.596040 | -0.656695 |
| H | 1.032372  | -0.596040 | -0.656695 |

Energy: -343.1982325409 a.u.  
CCSD(T)/def2-TZVPP: -342.68916700 a.u.

**PF<sub>3</sub>**

|   |           |           |           |
|---|-----------|-----------|-----------|
| P | 0.000000  | 0.000000  | 0.505891  |
| F | 0.000000  | 1.390041  | -0.281051 |
| F | -1.203811 | -0.695021 | -0.281051 |
| F | 1.203811  | -0.695021 | -0.281051 |

Energy: -641.1964161087 a.u.  
CCSD(T)/def2-TZVPP: -640.23999606 a.u.

**PCl<sub>3</sub>**

|    |           |           |           |
|----|-----------|-----------|-----------|
| P  | 0.000000  | 0.000000  | 0.729357  |
| Cl | 0.000000  | 1.851667  | -0.214517 |
| Cl | -1.603590 | -0.925833 | -0.214517 |

Cl 1.603590 -0.925833 -0.214517  
Energy: -1722.284910249 a.u.  
CCSD(T)/def2-TZVPP: -1720.15159743 a.u.

**PMe<sub>3</sub>**

|   |           |           |           |
|---|-----------|-----------|-----------|
| P | 0.000003  | 0.000029  | -0.602137 |
| C | 1.470545  | 0.715875  | 0.279185  |
| H | 2.376355  | 0.171367  | -0.019339 |
| H | 1.600717  | 1.764659  | -0.019344 |
| H | 1.371192  | 0.667552  | 1.374165  |
| C | -0.115275 | -1.631439 | 0.279161  |
| H | 0.727907  | -2.268634 | -0.019306 |
| H | -0.107417 | -1.521154 | 1.374159  |
| H | -1.039725 | -2.143696 | -0.019198 |
| C | -1.355275 | 0.915527  | 0.279210  |
| H | -1.263792 | 0.853543  | 1.374175  |
| H | -1.336581 | 1.972243  | -0.019177 |
| H | -2.328663 | 0.503904  | -0.019416 |

Energy: -461.2029093069 a.u.  
CCSD(T)/def2-TZVPP: -460.42747376 a.u.

**PPh<sub>3</sub>**

|   |           |           |           |
|---|-----------|-----------|-----------|
| P | -0.000271 | -0.000227 | -1.198736 |
| C | 1.313110  | -1.022629 | -0.398057 |
| C | 1.599262  | -2.265023 | -0.992840 |
| C | 2.060869  | -0.625297 | 0.721656  |
| C | 2.588412  | -3.097893 | -0.468017 |
| C | 3.062132  | -1.453263 | 1.237866  |
| C | 3.325718  | -2.692012 | 0.648596  |
| H | 1.042226  | -2.576931 | -1.878606 |
| H | 1.862153  | 0.338349  | 1.191084  |
| H | 2.793062  | -4.059799 | -0.939389 |
| H | 3.636307  | -1.128021 | 2.106379  |
| H | 4.107298  | -3.336050 | 1.052586  |
| C | -1.542762 | -0.626204 | -0.398790 |
| C | -2.761810 | -0.247294 | -0.990188 |
| C | -1.573001 | -1.477695 | 0.716953  |
| C | -3.977962 | -0.687034 | -0.465591 |
| C | -2.791026 | -1.930470 | 1.232765  |
| C | -3.995545 | -1.533667 | 0.647195  |
| H | -2.753270 | 0.395201  | -1.872964 |
| H | -0.639202 | -1.791706 | 1.183638  |
| H | -4.913282 | -0.378754 | -0.934073 |
| H | -2.796707 | -2.594425 | 2.098154  |
| H | -4.944360 | -1.887981 | 1.051015  |
| C | 0.228882  | 1.648437  | -0.398862 |
| C | -0.495650 | 2.102152  | 0.714675  |
| C | 1.169549  | 2.512904  | -0.988092 |
| C | -0.278048 | 3.383282  | 1.230397  |
| C | 1.397446  | 3.785838  | -0.463576 |
| C | 0.670758  | 4.226167  | 0.646981  |
| H | -1.237043 | 1.452090  | 1.179643  |
| H | 1.723600  | 2.182917  | -1.869170 |
| H | -0.852055 | 3.721556  | 2.094034  |
| H | 2.134465  | 4.440215  | -0.930412 |
| H | 0.838873  | 5.224961  | 1.050708  |

Energy: -1036.628030944 a.u.

**H<sub>3</sub>PO**

|   |           |           |           |
|---|-----------|-----------|-----------|
| P | 0.000000  | 0.000000  | 0.383381  |
| H | 0.000000  | 1.268725  | 1.036250  |
| H | 1.098748  | -0.634363 | 1.036250  |
| H | -1.098748 | -0.634363 | 1.036250  |
| O | 0.000000  | 0.000000  | -1.107433 |

Energy: -418.4764304583 a.u.  
CCSD(T)/def2-TZVPP: -417.83587021 a.u.

**H<sub>2</sub>POH**

|   |          |          |          |
|---|----------|----------|----------|
| P | 0.561460 | 0.141584 | 0.003368 |
|---|----------|----------|----------|

H 0.936232 -0.762286 -1.045673  
H 0.935599 -0.811556 1.007905  
O -1.092703 -0.155904 -0.003313  
H -1.552107 0.697306 0.013744  
Energy: -418.4764179631 a.u.  
CCSD(T)/def2-TZVPP: -417.83691804 a.u.

### F<sub>3</sub>PO

P 0.000000 0.000000 0.150319  
F 0.000000 1.382940 -0.558693  
F -1.197661 -0.691470 -0.558693  
F 1.197661 -0.691470 -0.558693  
O 0.000000 0.000000 1.603741  
Energy: -716.5019375512 a.u.  
CCSD(T)/def2-TZVPP: -715.42373944 a.u.

### F<sub>2</sub>POF

P 0.590737 0.000013 0.521374  
F 0.880791 1.192489 -0.488431  
F 0.880801 -1.192508 -0.488400  
O -1.003586 0.000013 0.723644  
F -1.854078 -0.000015 -0.535365  
Energy: -716.3243287228 a.u.  
CCSD(T)/def2-TZVPP: -715.22046539 a.u.

### Cl<sub>3</sub>PO

P 0.000000 0.000000 0.428773  
Cl 0.000000 1.839242 -0.423647  
Cl -1.592831 -0.919621 -0.423647  
Cl 1.592831 -0.919621 -0.423647  
O 0.000000 0.000000 1.896797  
Energy: -1797.578954904 a.u.  
CCSD(T)/def2-TZVPP: -1795.32063618 a.u.

### Cl<sub>2</sub>POCl

P -0.596491 -0.000113 0.845154  
Cl -1.041714 -1.591292 -0.401530  
Cl -1.043263 1.590523 -0.401645  
O 1.014615 0.000474 0.977953  
Cl 2.133827 0.000646 -0.402761  
Energy: -1797.488662948 a.u.  
CCSD(T)/def2-TZVPP: -1795.21907274 a.u.

### Me<sub>3</sub>PO

P -0.000032 -0.000008 0.183304  
O -0.000000 -0.000218 1.679308  
C 1.173926 1.188814 -0.554577  
H 2.186628 0.948315 -0.206934  
H 1.152560 1.167529 -1.652168  
H 0.920854 2.198340 -0.206610  
C 0.442567 -1.610912 -0.554943  
H 1.443417 -1.896492 -0.207039  
H -0.272017 -2.367822 -0.207505  
H 0.434863 -1.581562 -1.652574  
C -1.616479 0.422311 -0.554665  
H -1.586852 0.415417 -1.652199  
H -2.363975 -0.302273 -0.207617  
H -1.915093 1.419144 -0.206260  
Energy: -536.5148574021 a.u.  
CCSD(T)/def2-TZVPP: -535.61013400 a.u.

### Me<sub>2</sub>POMe

P 0.340305 -0.011396 -0.541872  
O -0.952581 -0.338502 0.481387  
C 1.017030 1.531744 0.233318  
H 0.344188 2.374888 0.028796  
H 1.141160 1.422510 1.320075  
H 1.990666 1.765181 -0.221814  
C 1.512125 -1.226814 0.199934

|   |           |           |           |
|---|-----------|-----------|-----------|
| H | 2.519837  | -1.041857 | -0.197706 |
| H | 1.534951  | -1.145305 | 1.295826  |
| H | 1.213453  | -2.244332 | -0.081036 |
| C | -2.260954 | -0.033218 | -0.012964 |
| H | -2.481021 | 1.044025  | 0.066592  |
| H | -2.378677 | -0.341770 | -1.064068 |
| H | -2.977686 | -0.584656 | 0.608592  |

Energy: -536.4676384116 a.u.

CCSD(T)/def2-TZVPP: -535.56125460 a.u.

### Ph<sub>3</sub>PO

|   |           |           |           |
|---|-----------|-----------|-----------|
| P | 0.000257  | 0.000104  | 0.920247  |
| C | -1.577850 | 0.600835  | 0.216777  |
| C | -2.298099 | 1.530218  | 0.984777  |
| C | -2.096103 | 0.175432  | -1.015647 |
| C | -3.511457 | 2.036983  | 0.516730  |
| C | -3.310981 | 0.685464  | -1.481317 |
| C | -4.017336 | 1.618311  | -0.717670 |
| H | -1.905438 | 1.832565  | 1.956138  |
| H | -1.561508 | -0.569865 | -1.605897 |
| H | -4.067146 | 2.755489  | 1.119947  |
| H | -3.710429 | 0.346027  | -2.437467 |
| H | -4.967429 | 2.011962  | -1.080135 |
| C | 1.309515  | 1.066328  | 0.216679  |
| C | 1.199021  | 1.729291  | -1.014865 |
| C | 2.475899  | 1.223299  | 0.982984  |
| C | 2.248259  | 2.525849  | -1.481320 |
| C | 3.521416  | 2.020431  | 0.514309  |
| C | 3.410559  | 2.669321  | -0.719241 |
| H | 0.285287  | 1.640489  | -1.603800 |
| H | 2.542556  | 0.730963  | 1.953704  |
| H | 2.153074  | 3.042464  | -2.436855 |
| H | 4.422463  | 2.141023  | 1.116387  |
| H | 4.226546  | 3.294977  | -1.082171 |
| C | 0.269098  | -1.666858 | 0.216562  |
| C | -0.172694 | -2.755668 | 0.985755  |
| C | 0.892981  | -1.902382 | -1.017855 |
| C | -0.005919 | -4.059688 | 0.516791  |
| C | 1.057561  | -3.209331 | -1.484495 |
| C | 0.605583  | -4.287868 | -0.719716 |
| H | -0.627926 | -2.567077 | 1.958550  |
| H | 1.269052  | -1.066448 | -1.609028 |
| H | -0.348097 | -4.900480 | 1.120847  |
| H | 1.548016  | -3.385109 | -2.442386 |
| H | 0.738696  | -5.307335 | -1.083005 |
| O | 0.000214  | -0.000125 | 2.419506  |

Energy: -1111.934038949 a.u.

### Ph<sub>2</sub>POPh

|   |           |           |           |
|---|-----------|-----------|-----------|
| P | 0.188156  | -0.156259 | 0.854201  |
| C | 1.601071  | -1.190986 | 0.285999  |
| C | 1.912428  | -2.317972 | 1.064052  |
| C | 2.355532  | -0.928535 | -0.869254 |
| C | 2.952731  | -3.173343 | 0.691664  |
| C | 3.392359  | -1.784406 | -1.242449 |
| C | 3.692440  | -2.906875 | -0.462701 |
| H | 1.333406  | -2.521944 | 1.966695  |
| H | 2.131932  | -0.049321 | -1.474085 |
| H | 3.186543  | -4.044926 | 1.303671  |
| H | 3.972215  | -1.574366 | -2.141928 |
| H | 4.506870  | -3.570799 | -0.754363 |
| C | 0.709686  | 1.513984  | 0.279455  |
| C | 1.627297  | 2.221818  | 1.075575  |
| C | 0.181038  | 2.132833  | -0.862877 |
| C | 2.027515  | 3.510354  | 0.721466  |
| C | 0.575464  | 3.428844  | -1.209966 |
| C | 1.500530  | 4.118292  | -0.423094 |
| H | 2.031571  | 1.760809  | 1.979737  |
| H | -0.538853 | 1.596117  | -1.480635 |

|   |           |           |           |
|---|-----------|-----------|-----------|
| H | 2.745332  | 4.045538  | 1.343994  |
| H | 0.156992  | 3.899790  | -2.100297 |
| H | 1.806023  | 5.128877  | -0.695246 |
| O | -0.893618 | -0.581023 | -0.381648 |
| C | -2.260036 | -0.584036 | -0.174713 |
| C | -3.017002 | -1.393734 | -1.031670 |
| C | -2.894320 | 0.194626  | 0.800764  |
| C | -4.405643 | -1.423016 | -0.907489 |
| C | -4.286423 | 0.148648  | 0.919570  |
| C | -5.048329 | -0.655512 | 0.069628  |
| H | -2.501089 | -1.990907 | -1.782958 |
| H | -2.304765 | 0.830024  | 1.461843  |
| H | -4.988883 | -2.055563 | -1.577421 |
| H | -4.775305 | 0.755741  | 1.682132  |
| H | -6.133414 | -0.682907 | 0.165282  |

Energy: -1111.904112174 a.u.

## (II) M06-2X/def2-TZVPP Optimized Geometries.

### **H<sub>3</sub>NO**

|   |          |           |           |
|---|----------|-----------|-----------|
| N | 3.913316 | -0.730741 | -3.786606 |
| H | 3.913306 | 0.218367  | -3.391459 |
| H | 4.735272 | -1.205041 | -3.391265 |
| H | 3.091379 | -1.205019 | -3.391271 |
| O | 3.913326 | -0.730434 | -5.141495 |

Energy: -131.6779111410 a.u.  
CCSD(T)/def2-TZVPP: -131.50017279 a.u.

### **H<sub>2</sub>NOH**

|   |           |           |           |
|---|-----------|-----------|-----------|
| N | 0.677794  | -0.000860 | 0.151908  |
| H | 1.042345  | 0.812703  | -0.332578 |
| H | 1.042289  | -0.809186 | -0.341268 |
| O | -0.713606 | 0.000975  | -0.139761 |
| H | -1.120342 | -0.005295 | 0.728573  |

Energy: -131.7188661260 a.u.  
CCSD(T)/def2-TZVPP: -131.54358218 a.u.

### **F<sub>3</sub>NO**

|   |           |           |           |
|---|-----------|-----------|-----------|
| N | 0.000000  | 0.000000  | 0.190239  |
| F | 0.000000  | 1.246661  | -0.448049 |
| F | -1.079640 | -0.623330 | -0.448049 |
| F | 1.079640  | -0.623330 | -0.448049 |
| O | 0.000000  | 0.000000  | 1.345706  |

Energy: -429.2906459075 a.u.  
CCSD(T)/def2-TZVPP: -428.77522880 a.u.

### **F<sub>2</sub>NOF**

|   |           |           |           |
|---|-----------|-----------|-----------|
| N | 0.542819  | -0.000031 | 0.526326  |
| F | 0.844011  | 1.058480  | -0.274816 |
| F | 0.843806  | -1.058632 | -0.274570 |
| O | -0.756855 | 0.000291  | 0.731926  |
| F | -1.437250 | -0.000083 | -0.510580 |

Energy: -429.2361063263 a.u.  
CCSD(T)/def2-TZVPP: -428.71942612 a.u.

### **Cl<sub>3</sub>NO**

|    |           |           |           |
|----|-----------|-----------|-----------|
| N  | 0.000000  | 0.000000  | 0.469014  |
| Cl | 0.000000  | 1.694517  | -0.322022 |
| Cl | -1.467495 | -0.847258 | -0.322022 |
| Cl | 1.467495  | -0.847258 | -0.322022 |
| O  | 0.000000  | 0.000000  | 1.642501  |

Energy: -1510.3861432530 a.u.  
CCSD(T)/def2-TZVPP: -1508.79300005 a.u.

### **Cl<sub>2</sub>NOCl**

|    |           |           |           |
|----|-----------|-----------|-----------|
| N  | -0.553184 | 0.000158  | 0.694987  |
| Cl | -0.988055 | -1.414755 | -0.212661 |

Cl -0.986433 1.415600 -0.212559  
O 0.748595 -0.000499 1.000823  
Cl 1.849990 -0.000675 -0.331926  
Energy: -1510.3848722180 a.u.  
CCSD(T)/def2-TZVPP: -1508.78542839 a.u.

**Me<sub>3</sub>NO**

N 0.000073 0.000027 0.079729  
O 0.000549 0.000515 1.436160  
C -0.309944 1.366167 -0.415850  
H 0.450519 2.026993 -0.012089  
H -0.320519 1.395127 -1.505571  
H -1.277950 1.635811 -0.005625  
C 1.338053 -0.415041 -0.415859  
H 2.055960 0.288735 -0.006829  
H 1.530060 -1.403595 -0.010922  
H 1.367902 -0.421607 -1.505587  
C -1.028570 -0.951557 -0.415022  
H -1.049337 -0.975008 -1.504718  
H -0.778054 -1.924878 -0.005278  
H -1.980718 -0.623302 -0.010380  
Energy: -249.6058861227 a.u.  
CCSD(T)/def2-TZVPP: -249.22526030 a.u.

**Me<sub>2</sub>NOMe**

N 0.390557 -0.124231 -0.300698  
O -0.709234 -0.183291 0.598707  
C 1.042084 1.148296 -0.052473  
H 0.349667 1.954430 -0.284106  
H 1.367838 1.242695 0.990744  
H 1.907623 1.226306 -0.708862  
C 1.253317 -1.241544 0.038156  
H 2.118761 -1.223860 -0.622846  
H 1.589475 -1.193910 1.081057  
H 0.711547 -2.172238 -0.119778  
C -1.886215 -0.439643 -0.131465  
H -2.079167 0.354140 -0.856094  
H -1.823363 -1.394893 -0.658745  
H -2.694997 -0.478532 0.596320  
Energy: -249.6226579350 a.u.  
CCSD(T)/def2-TZVPP: -249.24098055 a.u.

**Ph<sub>3</sub>NO**

N 0.021113 -0.008802 0.737245  
C -1.400651 0.080500 0.261356  
C -2.240558 0.889023 1.008383  
C -1.849220 -0.582748 -0.866453  
C -3.556899 1.043202 0.606143  
C -3.176334 -0.425362 -1.255806  
C -4.028555 0.387299 -0.526185  
H -1.844858 1.355853 1.897877  
H -1.189281 -1.218852 -1.438342  
H -4.220147 1.672248 1.184301  
H -3.536957 -0.947286 -2.131526  
H -5.059121 0.505190 -0.832158  
C 0.790710 1.183393 0.243354  
C 0.450002 1.852071 -0.919271  
C 1.880416 1.566928 1.005601  
C 1.226916 2.931211 -1.327641  
C 2.649777 2.640273 0.584800  
C 2.326134 3.324875 -0.581052  
H -0.407818 1.551988 -1.502946  
H 2.080288 1.028455 1.919674  
H 0.961636 3.463836 -2.230640  
H 3.501357 2.948600 1.175832  
H 2.924483 4.167228 -0.900230  
C 0.647673 -1.274948 0.229953  
C 0.320049 -2.428092 0.925153  
C 1.480693 -1.309375 -0.872774



|   |           |           |           |
|---|-----------|-----------|-----------|
| C | 0.829226  | -3.641234 | 0.495018  |
| C | 1.993845  | -2.535457 | -1.289875 |
| C | 1.667646  | -3.698995 | -0.614160 |
| H | -0.307868 | -2.338673 | 1.798932  |
| H | 1.740899  | -0.406792 | -1.405374 |
| H | 0.576942  | -4.545642 | 1.031872  |
| H | 2.652344  | -2.569050 | -2.147022 |
| H | 2.069410  | -4.647966 | -0.942379 |
| O | 0.035719  | -0.024575 | 2.100400  |

Energy: -824.7820819366 a.u.

### Ph<sub>2</sub>NOPh

|   |           |           |           |
|---|-----------|-----------|-----------|
| N | 0.393478  | -0.029590 | -0.076553 |
| C | 1.497054  | -0.913757 | -0.044561 |
| C | 1.240866  | -2.274816 | 0.126790  |
| C | 2.810433  | -0.470785 | -0.169984 |
| C | 2.289872  | -3.175342 | 0.179838  |
| C | 3.854657  | -1.383512 | -0.100282 |
| C | 3.604585  | -2.735753 | 0.074577  |
| H | 0.217689  | -2.614066 | 0.213309  |
| H | 3.017809  | 0.576994  | -0.331448 |
| H | 2.078360  | -4.228015 | 0.311533  |
| H | 4.871595  | -1.028428 | -0.200259 |
| H | 4.422283  | -3.441293 | 0.123068  |
| C | 0.514738  | 1.375375  | -0.098597 |
| C | 1.250156  | 1.998775  | 0.912258  |
| C | -0.146697 | 2.149740  | -1.046498 |
| C | 1.348858  | 3.378304  | 0.945951  |
| C | -0.050028 | 3.534368  | -0.992005 |
| C | 0.699960  | 4.156501  | -0.006662 |
| H | 1.733607  | 1.393214  | 1.667118  |
| H | -0.734644 | 1.669734  | -1.813881 |
| H | 1.924006  | 3.849348  | 1.731812  |
| H | -0.568225 | 4.127255  | -1.733718 |
| H | 0.771489  | 5.234513  | 0.028408  |
| O | -0.603391 | -0.510911 | -0.923537 |
| C | -1.830666 | -0.659387 | -0.314613 |
| C | -2.843136 | -1.119608 | -1.148896 |
| C | -2.074155 | -0.381176 | 1.021052  |
| C | -4.113881 | -1.307366 | -0.632839 |
| C | -3.357323 | -0.575528 | 1.520540  |
| C | -4.378828 | -1.036332 | 0.705125  |
| H | -2.615341 | -1.325588 | -2.185745 |
| H | -1.278109 | -0.019878 | 1.653974  |
| H | -4.902020 | -1.668226 | -1.280032 |
| H | -3.552663 | -0.359145 | 2.562294  |
| H | -5.372493 | -1.182589 | 1.104546  |

Energy: -824.8268607047 a.u.

### H<sub>3</sub>PO

|   |           |           |           |
|---|-----------|-----------|-----------|
| P | 0.000000  | 0.000000  | 0.380047  |
| H | 0.000000  | 1.256045  | 1.011410  |
| H | 1.087767  | -0.628023 | 1.011410  |
| H | -1.087767 | -0.628023 | 1.011410  |
| O | 0.000000  | 0.000000  | -1.091867 |

Energy: -418.3672820631 a.u.  
CCSD(T)/def2-TZVPP: -417.83637557 a.u.

### H<sub>2</sub>POH

|   |           |           |           |
|---|-----------|-----------|-----------|
| P | -0.562516 | -0.116680 | 0.000021  |
| H | -0.850105 | 0.824659  | -1.022104 |
| H | -0.849645 | 0.824921  | 1.022037  |
| O | 1.083018  | -0.086203 | -0.000003 |
| H | 1.473346  | 0.790240  | -0.000224 |

Energy: -418.3714632740 a.u.  
CCSD(T)/def2-TZVPP: -417.83731187 a.u.

### F<sub>3</sub>PO

|   |          |          |          |
|---|----------|----------|----------|
| P | 0.000000 | 0.000000 | 0.145373 |
|---|----------|----------|----------|

F 0.000000 1.358931 -0.548296  
F -1.176869 -0.679465 -0.548296  
F 1.176869 -0.679465 -0.548296  
O 0.000000 0.000000 1.577923  
Energy: -716.3037449873 a.u.  
CCSD(T)/def2-TZVPP: -715.42524001 a.u.

#### **F<sub>2</sub>POF**

P -0.612753 -0.000020 0.529538  
F -0.778948 -1.168934 -0.498574  
F -0.777941 1.169621 -0.497872  
O 1.009156 -0.000730 0.713767  
F 1.681116 -0.000005 -0.520579  
Energy: -716.1025968857 a.u.  
CCSD(T)/def2-TZVPP: -715.22308169 a.u.

#### **Cl<sub>3</sub>PO**

P 0.000000 0.000000 0.421831  
Cl 0.000000 1.813252 -0.417245  
Cl -1.570322 -0.906626 -0.417245  
Cl 1.570322 -0.906626 -0.417245  
O 0.000000 0.000000 1.869001  
Energy: -1797.2792560230 a.u.  
CCSD(T)/def2-TZVPP: -1795.32139145 a.u.

#### **Cl<sub>2</sub>POCl**

P 0.613274 0.000060 0.864817  
Cl 0.967552 1.563041 -0.411967  
Cl 0.968005 -1.562817 -0.412010  
O -1.004210 -0.000202 0.959554  
Cl -2.004111 -0.000182 -0.390652  
Energy: -1797.1852747100 a.u.  
CCSD(T)/def2-TZVPP: -1795.22072308 a.u.

#### **Me<sub>3</sub>PO**

P 0.000148 -0.000068 0.180480  
O 0.001469 -0.000463 1.658595  
C 1.374873 -0.919873 -0.548799  
H 1.326392 -1.951461 -0.202940  
H 1.343683 -0.898882 -1.637519  
H 2.310163 -0.482122 -0.202678  
C -1.484930 -0.730887 -0.546833  
H -1.573144 -1.760029 -0.201407  
H -2.353806 -0.173583 -0.199394  
H -1.452170 -0.713561 -1.635585  
C 0.108608 1.651253 -0.547405  
H 0.101940 1.614558 -1.636162  
H -0.736279 2.242755 -0.197487  
H 1.027946 2.124083 -0.204565  
Energy: -536.3456842656 a.u.  
CCSD(T)/def2-TZVPP: -535.61066527 a.u.

#### **Me<sub>2</sub>POMe**

P 0.341873 -0.019692 -0.545795  
O -0.922059 -0.416986 0.446327  
C 0.894160 1.549136 0.235590  
H 0.160965 2.332564 0.046235  
H 1.024275 1.427458 1.311326  
H 1.838522 1.860713 -0.213197  
C 1.567702 -1.141947 0.213073  
H 2.560171 -0.888530 -0.160837  
H 1.553987 -1.049024 1.299210  
H 1.345791 -2.170560 -0.064926  
C -2.218181 -0.065150 0.002664  
H -2.367834 1.017695 0.029800  
H -2.396818 -0.418447 -1.015633  
H -2.932773 -0.532838 0.676372  
Energy: -536.3019675237 a.u.  
CCSD(T)/def2-TZVPP: -535.56182502 a.u.

**Ph<sub>3</sub>PO**

|   |           |           |           |
|---|-----------|-----------|-----------|
| P | -0.005148 | -0.004161 | 0.929651  |
| C | 1.510276  | 0.703806  | 0.237620  |
| C | 2.663485  | 0.602133  | 1.013590  |
| C | 1.567357  | 1.324203  | -1.008236 |
| C | 3.866308  | 1.104544  | 0.538633  |
| C | 2.772955  | 1.823724  | -1.481749 |
| C | 3.921840  | 1.711313  | -0.709657 |
| H | 2.600062  | 0.144076  | 1.992549  |
| H | 0.668646  | 1.432378  | -1.603571 |
| H | 4.758830  | 1.028624  | 1.144935  |
| H | 2.813341  | 2.308837  | -2.447653 |
| H | 4.859798  | 2.105824  | -1.077401 |
| C | -0.146985 | -1.665255 | 0.223842  |
| C | 0.380619  | -2.022019 | -1.014955 |
| C | -0.828961 | -2.613844 | 0.983930  |
| C | 0.213172  | -3.313049 | -1.496969 |
| C | -0.992867 | -3.903842 | 0.500440  |
| C | -0.475572 | -4.252320 | -0.740740 |
| H | 0.936349  | -1.297989 | -1.598130 |
| H | -1.209402 | -2.333236 | 1.957995  |
| H | 0.628484  | -3.587832 | -2.457174 |
| H | -1.518509 | -4.639250 | 1.094464  |
| H | -0.601354 | -5.259510 | -1.115009 |
| C | -1.368163 | 0.955176  | 0.222568  |
| C | -1.822940 | 2.041444  | 0.968366  |
| C | -1.963081 | 0.659851  | -1.001473 |
| C | -2.856039 | 2.831345  | 0.485984  |
| C | -2.996236 | 1.453210  | -1.482225 |
| C | -3.440757 | 2.538855  | -0.739743 |
| H | -1.372534 | 2.245063  | 1.931645  |
| H | -1.633383 | -0.198837 | -1.573332 |
| H | -3.209775 | 3.670866  | 1.068961  |
| H | -3.460202 | 1.217631  | -2.430483 |
| H | -4.250235 | 3.152265  | -1.112338 |
| O | -0.012104 | -0.007482 | 2.409837  |

Energy: -1111.5264587910 a.u.

**Ph<sub>2</sub>POPh**

|   |           |           |           |
|---|-----------|-----------|-----------|
| P | -0.324705 | -0.617943 | -0.959957 |
| C | -1.909585 | -1.234603 | -0.297399 |
| C | -2.687941 | -2.048118 | -1.115117 |
| C | -2.357284 | -0.925584 | 0.987749  |
| C | -3.903923 | -2.546741 | -0.660135 |
| C | -3.562375 | -1.431013 | 1.445681  |
| C | -4.338348 | -2.239425 | 0.619632  |
| H | -2.339442 | -2.293762 | -2.111016 |
| H | -1.757508 | -0.286056 | 1.623909  |
| H | -4.505646 | -3.175125 | -1.302999 |
| H | -3.904495 | -1.191448 | 2.443713  |
| H | -5.282913 | -2.627192 | 0.977813  |
| C | -0.445729 | 1.139197  | -0.460524 |
| C | -1.273813 | 1.978259  | -1.207146 |
| C | 0.288653  | 1.672227  | 0.594725  |
| C | -1.381470 | 3.323069  | -0.890924 |
| C | 0.186333  | 3.023518  | 0.905944  |
| C | -0.648669 | 3.848928  | 0.167478  |
| H | -1.841364 | 1.574681  | -2.038734 |
| H | 0.939142  | 1.030605  | 1.175680  |
| H | -2.032351 | 3.963269  | -1.471518 |
| H | 0.761305  | 3.429192  | 1.727761  |
| H | -0.727367 | 4.899822  | 0.411382  |
| O | 0.650690  | -1.200701 | 0.257051  |
| C | 2.004414  | -1.317798 | 0.092934  |
| C | 2.644503  | -2.310865 | 0.826757  |
| C | 2.736177  | -0.473799 | -0.734641 |
| C | 4.017558  | -2.460129 | 0.726051  |
| C | 4.112516  | -0.639835 | -0.831824 |

|   |          |           |           |
|---|----------|-----------|-----------|
| C | 4.758849 | -1.628277 | -0.105823 |
| H | 2.048747 | -2.950981 | 1.462650  |
| H | 2.239714 | 0.310096  | -1.292007 |
| H | 4.511319 | -3.234703 | 1.297579  |
| H | 4.678982 | 0.016938  | -1.478405 |
| H | 5.830139 | -1.749788 | -0.184328 |

Energy: -1111.4972945550 a.u.
